# Supplementary material for: Feline respiratory disease complex: insights into the role of viral and bacterial co-infections
Source: PubMed Central journal article supplement (PMC11405337; doi:10.3389/fmicb.2024.1455453), 2024-09-03
Supplement: Data_Sheet_1.pdf [file Data_Sheet_1.pdf]

**Supplementary Table 1.** Specimen type and number of specimens.

| <b>Specimen type</b>                        | <b>Number of specimens</b> |
|---------------------------------------------|----------------------------|
| Conjunctiva and nasal swab                  | 6                          |
| Conjunctiva and oropharyngeal swab          | 54                         |
| Conjunctival, nasal, and oropharyngeal swab | 16                         |
| Eye swab                                    | 25                         |
| Lung                                        | 51                         |
| Nasal swab                                  | 248                        |
| Oropharyngeal swab                          | 105                        |
| Transtracheal wash                          | 12                         |
| Unknown                                     | 38                         |
| <b>Total</b>                                | <b>555</b>                 |

**Supplementary Table 2.** Frequency of variables including demographics, temporal characteristics, and six pathogens.

| Variables                                       | Frequency | Percent |
|-------------------------------------------------|-----------|---------|
| <b>Demographic and temporal characteristics</b> |           |         |
| Age of cats                                     |           |         |
| Kitten                                          | 31        | 16.6    |
| Junior                                          | 48        | 25.7    |
| Adult                                           | 75        | 40.1    |
| Senior                                          | 33        | 17.6    |
| Sex of cats                                     |           |         |
| Female                                          | 85        | 45.5    |
| Male                                            | 102       | 54.5    |
| Season                                          |           |         |
| Cold                                            | 104       | 55.6    |
| Warm                                            | 83        | 44.4    |
| <b>Six pathogens</b>                            |           |         |
| <i>B. bronchiseptica</i> *                      |           |         |
| Absent                                          | 182       | 97.3    |
| Present                                         | 5         | 2.7     |
| <i>Chlamydia felis</i> *                        |           |         |
| Absent                                          | 179       | 95.7    |
| Present                                         | 8         | 4.3     |
| FCV                                             |           |         |
| Absent                                          | 119       | 63.6    |
| Present                                         | 68        | 36.4    |
| FeHV                                            |           |         |
| Absent                                          | 148       | 79.1    |
| Present                                         | 39        | 20.9    |
| Influenza*                                      |           |         |
| Absent                                          | 187       | 100.0   |
| Present                                         | 0         | 0.0     |
| <i>Mycoplasma</i> spp.                          |           |         |
| Absent                                          | 93        | 49.7    |
| Present                                         | 94        | 50.3    |

FCV: *Feline calicivirus*, FeHV: *Felid alpha herpesvirus 1*

Variables are indicated by an asterisk (\*) when the proportion of the binary results is lower than 5%.

Number of tested cats: 187.

**Supplementary Table 3.** Frequency of absence and presence of co-infection of two pathogens in cats. Cats with zero or one pathogen are classified as absence, while cats testing positive for two pathogens are classified as presence.

| <b>Variables</b>                                    | <b>Frequency</b> | <b>Percent</b> |
|-----------------------------------------------------|------------------|----------------|
| <i>B. bronchiseptica</i> + <i>Chlamydia felis</i> * |                  |                |
| Absent                                              | 186              | 99.5           |
| Present                                             | 1                | 0.5            |
| <i>B. bronchiseptica</i> + FCV*                     |                  |                |
| Absent                                              | 185              | 98.9           |
| Present                                             | 2                | 1.1            |
| <i>B. bronchiseptica</i> + FeHV*                    |                  |                |
| Absent                                              | 185              | 98.9           |
| Present                                             | 2                | 1.1            |
| <i>B. bronchiseptica</i> + <i>Mycoplasma</i> spp.*  |                  |                |
| Absent                                              | 183              | 97.9           |
| Present                                             | 4                | 2.1            |
| <i>Chlamydia felis</i> + FCV*                       |                  |                |
| Absent                                              | 183              | 97.9           |
| Present                                             | 4                | 2.1            |
| <i>Chlamydia felis</i> + FeHV*                      |                  |                |
| Absent                                              | 184              | 98.4           |
| Present                                             | 3                | 1.6            |
| <i>Chlamydia felis</i> + <i>Mycoplasma</i> spp.*    |                  |                |
| Absent                                              | 182              | 97.3           |
| Present                                             | 5                | 2.7            |
| FCV + FeHV                                          |                  |                |
| Absent                                              | 172              | 92.0           |
| Present                                             | 15               | 8.0            |
| FCV + <i>Mycoplasma</i> spp.                        |                  |                |
| Absent                                              | 141              | 75.4           |
| Present                                             | 46               | 24.6           |
| FeHV + <i>Mycoplasma</i> spp.                       |                  |                |
| Absent                                              | 165              | 88.2           |
| Present                                             | 22               | 11.8           |

*B. bronchiseptica*: *Bordetella bronchiseptica*, FCV: Feline calicivirus, FeHV: Felid alphaherpesvirus 1. Variables are indicated by an asterisk (\*) when the proportion of the binary results is lower than 5%. Number of tested cats: 187.

**Supplementary Table 4.** Frequency of absence and presence of co-infection of three pathogens in cats. Cats with zero, one, or two pathogens are classified as absence, while cats testing positive for three pathogens are classified as presence.

| Variables                                                                   | Frequency | Percent |
|-----------------------------------------------------------------------------|-----------|---------|
| <i>B. bronchiseptica</i> + <i>Chlamydia felis</i> + FCV*                    |           |         |
| Absent                                                                      | 187       | 100.0   |
| Present                                                                     | 0         | 0.0     |
| <i>B. bronchiseptica</i> + <i>Chlamydia felis</i> + FeHV-1*                 |           |         |
| Absent                                                                      | 186       | 99.5    |
| Present                                                                     | 1         | 0.5     |
| <i>B. bronchiseptica</i> + <i>Chlamydia felis</i> + <i>Mycoplasma</i> spp.* |           |         |
| Absent                                                                      | 187       | 100.0   |
| Present                                                                     | 0         | 0.0     |
| <i>B. bronchiseptica</i> + FCV + FeHV-1*                                    |           |         |
| Absent                                                                      | 185       | 98.9    |
| Present                                                                     | 2         | 1.1     |
| <i>B. bronchiseptica</i> + FCV + <i>Mycoplasma</i> spp.*                    |           |         |
| Absent                                                                      | 186       | 99.5    |
| Present                                                                     | 1         | 0.5     |
| <i>B. bronchiseptica</i> + FeHV-1 + <i>Mycoplasma</i> spp.*                 |           |         |
| Absent                                                                      | 186       | 99.5    |
| Present                                                                     | 1         | 0.5     |
| <i>Chlamydia felis</i> + FCV + FeHV-1*                                      |           |         |
| Absent                                                                      | 185       | 98.9    |
| Present                                                                     | 2         | 1.1     |
| <i>Chlamydia felis</i> + FCV + <i>Mycoplasma</i> spp.*                      |           |         |
| Absent                                                                      | 185       | 98.9    |
| Present                                                                     | 2         | 1.1     |
| <i>Chlamydia felis</i> + FeHV-1 + <i>Mycoplasma</i> spp.*                   |           |         |
| Absent                                                                      | 187       | 100.0   |
| Present                                                                     | 0         | 0.0     |
| FCV + FeHV-1 + <i>Mycoplasma</i> spp.                                       |           |         |
| Absent                                                                      | 176       | 94.1    |
| Present                                                                     | 11        | 5.9     |

*B. bronchiseptica*: *Bordetella bronchiseptica*, FCV: *Feline calicivirus*, FeHV-1: *Felid alpha herpesvirus 1*  
Variables are indicated by an asterisk (\*) when the proportion of the binary results is lower than 5%.  
Number of tested cats: 187.
